# Supplementary material for: Hamiltonian energy as an efficient approach to identify the significant key regulators in biological networks
Source: PLoS One. 2019 Aug 23;14(8):e0221463. doi: 10.1371/journal.pone.0221463 (PMC6707611; doi:10.1371/journal.pone.0221463)
Supplement: S2 File — Interacting partners of 182 ARGs based on the relationships between TFs, miRNAs and Proteins. (XLSX) [file pone.0221463.s003.xlsx]

## Sheet: S3
hsa-let-7a	1	PPP3R1
hsa-let-7a	1	FAS
hsa-let-7a	1	DAPK1
hsa-let-7a	1	IL6
hsa-let-7a	1	BNIP3L
hsa-let-7a	1	NRAS
hsa-let-7a	1	NGF
hsa-let-7a	1	BCL2L1
hsa-let-7a	1	UBA52
hsa-let-7a	1	PCNA
hsa-let-7a	1	TNFRSF1B
hsa-let-7a	1	TNFSF10
hsa-let-7a	1	RNF8
hsa-let-7a	1	MYD88
hsa-let-7a	1	BAG1
hsa-let-7a	1	PSEN1
hsa-let-7a	1	BBC3
hsa-let-7a	1	CHUK
hsa-let-7a	1	CASP3
hsa-let-7a	1	TP53
hsa-let-7a	1	MYC
hsa-let-7a	1	CDKN1A
hsa-let-7a	1	IRAK2
hsa-let-7a	1	BAX
hsa-let-7a	1	AKT2
hsa-let-7a	1	FASLG
hsa-let-7a	1	AKT3
hsa-let-7a	1	AIFM1
hsa-let-7a	1	CDKN1B
hsa-let-7a	1	BAD
hsa-let-7a	1	PARP1
hsa-let-7a	1	IL10
hsa-let-7b	1	PPP3R1
hsa-let-7b	1	FAS
hsa-let-7b	1	PIK3R5
hsa-let-7b	1	DAPK1
hsa-let-7b	1	IL6
hsa-let-7b	1	BNIP3L
hsa-let-7b	1	NRAS
hsa-let-7b	1	NGF
hsa-let-7b	1	BCL2L1
hsa-let-7b	1	UBA52
hsa-let-7b	1	CASP2
hsa-let-7b	1	PCNA
hsa-let-7b	1	TNFRSF1B
hsa-let-7b	1	TNFSF10
hsa-let-7b	1	RNF8
hsa-let-7b	1	MYD88
hsa-let-7b	1	BAG1
hsa-let-7b	1	PSEN1
hsa-let-7b	1	CASP8
hsa-let-7b	1	BBC3
hsa-let-7b	1	CHUK
hsa-let-7b	1	CASP3
hsa-let-7b	1	TP53
hsa-let-7b	1	MYC
hsa-let-7b	1	PRKACB
hsa-let-7b	1	CDKN1A
hsa-let-7b	1	IRAK2
hsa-let-7b	1	BAX
hsa-let-7b	1	AKT2
hsa-let-7b	1	FASLG
hsa-let-7b	1	AKT3
hsa-let-7b	1	AIFM1
hsa-let-7b	1	CDKN1B
hsa-let-7b	1	BAD
hsa-let-7b	1	PARP1
hsa-let-7b	1	IL10
hsa-let-7c	1	PPP3R1
hsa-let-7c	1	FAS
hsa-let-7c	1	DAPK1
hsa-let-7c	1	IL6
hsa-let-7c	1	BNIP3L
hsa-let-7c	1	NRAS
hsa-let-7c	1	NGF
hsa-let-7c	1	BCL2L1
hsa-let-7c	1	UBA52
hsa-let-7c	1	PCNA
hsa-let-7c	1	TNFRSF1B
hsa-let-7c	1	TNFSF10
hsa-let-7c	1	RNF8
hsa-let-7c	1	MYD88
hsa-let-7c	1	BAG1
hsa-let-7c	1	PSEN1
hsa-let-7c	1	BBC3
hsa-let-7c	1	CHUK
hsa-let-7c	1	CASP3
hsa-let-7c	1	TP53
hsa-let-7c	1	MYC
hsa-let-7c	1	CDKN1A
hsa-let-7c	1	IRAK2
hsa-let-7c	1	BAX
hsa-let-7c	1	AKT2
hsa-let-7c	1	FASLG
hsa-let-7c	1	AKT3
hsa-let-7c	1	AIFM1
hsa-let-7c	1	CDKN1B
hsa-let-7c	1	BAD
hsa-let-7c	1	PARP1
hsa-let-7c	1	IL10
hsa-let-7d	1	PPP3R1
hsa-let-7d	1	FAS
hsa-let-7d	1	DAPK1
hsa-let-7d	1	IL6
hsa-let-7d	1	BNIP3L
hsa-let-7d	1	NRAS
hsa-let-7d	1	NGF
hsa-let-7d	1	BCL2L1
hsa-let-7d	1	UBA52
hsa-let-7d	1	PCNA
hsa-let-7d	1	TNFRSF1B
hsa-let-7d	1	TNFSF10
hsa-let-7d	1	RNF8
hsa-let-7d	1	MYD88
hsa-let-7d	1	BAG1
hsa-let-7d	1	PSEN1
hsa-let-7d	1	BBC3
hsa-let-7d	1	CHUK
hsa-let-7d	1	CASP3
hsa-let-7d	1	TP53
hsa-let-7d	1	MYC
hsa-let-7d	1	CDKN1A
hsa-let-7d	1	IRAK2
hsa-let-7d	1	BAX
hsa-let-7d	1	AKT2
hsa-let-7d	1	FASLG
hsa-let-7d	1	AKT3
hsa-let-7d	1	AIFM1
hsa-let-7d	1	CDKN1B
hsa-let-7d	1	BAD
hsa-let-7d	1	PARP1
hsa-let-7d	1	IL10
hsa-let-7e	1	PPP3R1
hsa-let-7e	1	FAS
hsa-let-7e	1	DAPK1
hsa-let-7e	1	IL6
hsa-let-7e	1	BNIP3L
hsa-let-7e	1	NRAS
hsa-let-7e	1	NGF
hsa-let-7e	1	BCL2L1
hsa-let-7e	1	HTRA2
hsa-let-7e	1	CASP2
hsa-let-7e	1	PCNA
hsa-let-7e	1	TNFRSF1B
hsa-let-7e	1	TNFSF10
hsa-let-7e	1	RNF8
hsa-let-7e	1	MYD88
hsa-let-7e	1	BAG1
hsa-let-7e	1	BFAR
hsa-let-7e	1	PSEN1
hsa-let-7e	1	CASP8
hsa-let-7e	1	CHUK
hsa-let-7e	1	CASP3
hsa-let-7e	1	TP53
hsa-let-7e	1	MYC
hsa-let-7e	1	CDKN1A
hsa-let-7e	1	BAX
hsa-let-7e	1	AKT2
hsa-let-7e	1	FASLG
hsa-let-7e	1	AKT3
hsa-let-7e	1	AIFM1
hsa-let-7e	1	CDKN1B
hsa-let-7e	1	PARP1
hsa-let-7e	1	IL10
hsa-let-7f	1	PPP3R1
hsa-let-7f	1	FAS
hsa-let-7f	1	DAPK1
hsa-let-7f	1	IL6
hsa-let-7f	1	BNIP3L
hsa-let-7f	1	NRAS
hsa-let-7f	1	NGF
hsa-let-7f	1	BCL2L1
hsa-let-7f	1	UBA52
hsa-let-7f	1	CASP2
hsa-let-7f	1	PCNA
hsa-let-7f	1	TNFRSF1B
hsa-let-7f	1	TNFSF10
hsa-let-7f	1	RNF8
hsa-let-7f	1	MYD88
hsa-let-7f	1	BAG1
hsa-let-7f	1	BFAR
hsa-let-7f	1	PSEN1
hsa-let-7f	1	CASP8
hsa-let-7f	1	CHUK
hsa-let-7f	1	CASP3
hsa-let-7f	1	TP53
hsa-let-7f	1	MYC
hsa-let-7f	1	PRKACB
hsa-let-7f	1	CDKN1A
hsa-let-7f	1	IRAK2
hsa-let-7f	1	BAX
hsa-let-7f	1	AKT2
hsa-let-7f	1	FASLG
hsa-let-7f	1	AKT3
hsa-let-7f	1	AIFM1
hsa-let-7f	1	CDKN1B
hsa-let-7f	1	PARP1
hsa-let-7f	1	IL10
hsa-miR-15a	1	IKBKB
hsa-miR-15a	1	DEDD
hsa-miR-15a	1	PRKAR1A
hsa-miR-15a	1	IL1RAP
hsa-miR-15a	1	CRADD
hsa-miR-15a	1	NFKB1
hsa-miR-15a	1	HTRA2
hsa-miR-15a	1	EXOG
hsa-miR-15a	1	BCL2
hsa-miR-15a	1	RTN4
hsa-miR-15a	1	PIK3R1
hsa-miR-15a	1	BAG5
hsa-miR-15a	1	NAIP
hsa-miR-15a	1	APP
hsa-miR-15a	1	AKT2
hsa-miR-15a	1	RARG
hsa-miR-15a	1	VEGFA
hsa-miR-15a	1	BFAR
hsa-miR-15a	1	APC
hsa-miR-15a	1	CHUK
hsa-miR-15a	1	PPP3CB
hsa-miR-15a	1	PRKAR2A
hsa-miR-15a	1	PIK3R3
hsa-miR-15a	1	DCC
hsa-miR-15a	1	MAP3K7
hsa-miR-15a	1	CCND1
hsa-miR-15a	1	NOD1
hsa-miR-15a	1	FGFR1
hsa-miR-15a	1	IRAK2
hsa-miR-15a	1	IL3
hsa-miR-15a	1	TP53
hsa-miR-15a	1	CFLAR
hsa-miR-15a	1	MFN2
hsa-miR-15a	1	AKT3
hsa-miR-15a	1	PSEN1
hsa-miR-16	1	IKBKB
hsa-miR-16	1	DEDD
hsa-miR-16	1	PRKAR1A
hsa-miR-16	1	IL1RAP
hsa-miR-16	1	CRADD
hsa-miR-16	1	NFKB1
hsa-miR-16	1	HTRA2
hsa-miR-16	1	BCL2
hsa-miR-16	1	RTN4
hsa-miR-16	1	PIK3R1
hsa-miR-16	1	BAG5
hsa-miR-16	1	APP
hsa-miR-16	1	RARG
hsa-miR-16	1	VEGFA
hsa-miR-16	1	BFAR
hsa-miR-16	1	APC
hsa-miR-16	1	CHUK
hsa-miR-16	1	PPP3CB
hsa-miR-16	1	PRKAR2A
hsa-miR-16	1	PIK3R3
hsa-miR-16	1	DCC
hsa-miR-16	1	MAP3K7
hsa-miR-16	1	CCND1
hsa-miR-16	1	NOD1
hsa-miR-16	1	FGFR1
hsa-miR-16	1	IRAK2
hsa-miR-16	1	IL3
hsa-miR-16	1	TP53
hsa-miR-16	1	CFLAR
hsa-miR-16	1	MFN2
hsa-miR-16	1	AKT3
hsa-miR-16	1	PSEN1
hsa-miR-17	1	PPP3R1
hsa-miR-17	1	FAS
hsa-miR-17	1	DEDD
hsa-miR-17	1	TNF
hsa-miR-17	1	PKMYT1
hsa-miR-17	1	NAIP
hsa-miR-17	1	IL6
hsa-miR-17	1	PRKAR1A
hsa-miR-17	1	BNIP3L
hsa-miR-17	1	CFLAR
hsa-miR-17	1	CASP7
hsa-miR-17	1	HTRA2
hsa-miR-17	1	CASP2
hsa-miR-17	1	BCL6
hsa-miR-17	1	CARD8
hsa-miR-17	1	BID
hsa-miR-17	1	CAPN2
hsa-miR-17	1	TNFSF10
hsa-miR-17	1	RNF8
hsa-miR-17	1	CASP6
hsa-miR-17	1	PIK3CD
hsa-miR-17	1	TNFRSF10B
hsa-miR-17	1	APP
hsa-miR-17	1	IL1RAP
hsa-miR-17	1	MAP3K14
hsa-miR-17	1	TNFRSF10A
hsa-miR-17	1	VEGFA
hsa-miR-17	1	CASP8
hsa-miR-17	1	MCL1
hsa-miR-17	1	APC
hsa-miR-17	1	CHUK
hsa-miR-17	1	PTEN
hsa-miR-17	1	IRAK4
hsa-miR-17	1	PPP3CA
hsa-miR-17	1	PPP3CB
hsa-miR-17	1	E2F1
hsa-miR-17	1	TRAF4
hsa-miR-17	1	DFFA
hsa-miR-17	1	MAP3K7
hsa-miR-17	1	CCND1
hsa-miR-17	1	PIK3CA
hsa-miR-17	1	PRKACB
hsa-miR-17	1	CDKN1A
hsa-miR-17	1	NOD1
hsa-miR-17	1	DEDD2
hsa-miR-17	1	CASP10
hsa-miR-17	1	IRAK3
hsa-miR-17	1	TANK
hsa-miR-17	1	MSH2
hsa-miR-17	1	FASLG
hsa-miR-17	1	CHP2
hsa-miR-17	1	TNFRSF10D
hsa-miR-17	1	UBC
hsa-miR-17	1	FGFR1
hsa-miR-17	1	RPS27A
hsa-miR-17	1	PRKAR2B
hsa-miR-17	1	MFN2
hsa-miR-17	1	AKT3
hsa-miR-17	1	BAD
hsa-miR-17	1	PARP1
hsa-miR-17	1	IL10
hsa-miR-18a	1	DEDD
hsa-miR-18a	1	PRKAR1A
hsa-miR-18a	1	CASP7
hsa-miR-18a	1	EGFR
hsa-miR-18a	1	RNF8
hsa-miR-18a	1	PRKACB
hsa-miR-18a	1	PSEN1
hsa-miR-18a	1	PTEN
hsa-miR-18a	1	PPP3CB
hsa-miR-18a	1	DFFA
hsa-miR-18a	1	ATM
hsa-miR-18a	1	PRKAR2A
hsa-miR-18a	1	ENDOD1
hsa-miR-18a	1	IL1RAP
hsa-miR-18a	1	TRADD
hsa-miR-18a	1	MKI67
hsa-miR-18a	1	CASP4
hsa-miR-18a	1	PRKX
hsa-miR-18a	1	TNFRSF10C
hsa-miR-19a	1	PPP3R1
hsa-miR-19a	1	FAS
hsa-miR-19a	1	IKBKB
hsa-miR-19a	1	TNF
hsa-miR-19a	1	APAF1
hsa-miR-19a	1	CASP7
hsa-miR-19a	1	NFKB1
hsa-miR-19a	1	KRAS
hsa-miR-19a	1	BAG4
hsa-miR-19a	1	TNFRSF1B
hsa-miR-19a	1	CAPN2
hsa-miR-19a	1	NFKBIA
hsa-miR-19a	1	CDC6
hsa-miR-19a	1	RNF8
hsa-miR-19a	1	RTN4
hsa-miR-19a	1	CASP2
hsa-miR-19a	1	CSF2RB
hsa-miR-19a	1	IL1RAP
hsa-miR-19a	1	RARG
hsa-miR-19a	1	IGFBP3
hsa-miR-19a	1	CASP8
hsa-miR-19a	1	IL1R1
hsa-miR-19a	1	PTEN
hsa-miR-19a	1	CASP10
hsa-miR-19a	1	PPP3CB
hsa-miR-19a	1	TP53
hsa-miR-19a	1	PIK3R3
hsa-miR-19a	1	TNFRSF12A
hsa-miR-19a	1	DCC
hsa-miR-19a	1	CCND1
hsa-miR-19a	1	PPP3R2
hsa-miR-19a	1	PIK3CA
hsa-miR-19a	1	PRKACB
hsa-miR-19a	1	DAPK1
hsa-miR-19a	1	IL1A
hsa-miR-19a	1	CASP1
hsa-miR-19a	1	CHP2
hsa-miR-19a	1	BRCA2
hsa-miR-19a	1	ABCB1
hsa-miR-19a	1	MALT1
hsa-miR-19a	1	MAPK1
hsa-miR-19a	1	PARP1
hsa-miR-19b	1	PPP3R1
hsa-miR-19b	1	FAS
hsa-miR-19b	1	IKBKB
hsa-miR-19b	1	DEDD
hsa-miR-19b	1	TNF
hsa-miR-19b	1	APAF1
hsa-miR-19b	1	CASP7
hsa-miR-19b	1	NFKB1
hsa-miR-19b	1	KRAS
hsa-miR-19b	1	BAG4
hsa-miR-19b	1	TNFRSF1B
hsa-miR-19b	1	CAPN2
hsa-miR-19b	1	NFKBIA
hsa-miR-19b	1	RNF8
hsa-miR-19b	1	RTN4
hsa-miR-19b	1	CASP2
hsa-miR-19b	1	CSF2RB
hsa-miR-19b	1	IL1RAP
hsa-miR-19b	1	RARG
hsa-miR-19b	1	IGFBP3
hsa-miR-19b	1	CASP8
hsa-miR-19b	1	IL1R1
hsa-miR-19b	1	PTEN
hsa-miR-19b	1	CASP10
hsa-miR-19b	1	PPP3CB
hsa-miR-19b	1	TP53
hsa-miR-19b	1	PIK3R3
hsa-miR-19b	1	TNFRSF12A
hsa-miR-19b	1	DCC
hsa-miR-19b	1	CCND1
hsa-miR-19b	1	PPP3R2
hsa-miR-19b	1	PIK3CA
hsa-miR-19b	1	PRKACB
hsa-miR-19b	1	DAPK1
hsa-miR-19b	1	IL1A
hsa-miR-19b	1	CASP1
hsa-miR-19b	1	CHP2
hsa-miR-19b	1	BRCA2
hsa-miR-19b	1	ABCB1
hsa-miR-19b	1	MALT1
hsa-miR-19b	1	MAPK1
hsa-miR-19b	1	PARP1
hsa-miR-20a	1	PPP3R1
hsa-miR-20a	1	DEDD
hsa-miR-20a	1	TNF
hsa-miR-20a	1	PKMYT1
hsa-miR-20a	1	NAIP
hsa-miR-20a	1	IL6
hsa-miR-20a	1	PRKAR1A
hsa-miR-20a	1	BNIP3L
hsa-miR-20a	1	CFLAR
hsa-miR-20a	1	CASP7
hsa-miR-20a	1	HTRA2
hsa-miR-20a	1	KRAS
hsa-miR-20a	1	CASP2
hsa-miR-20a	1	BCL6
hsa-miR-20a	1	CARD8
hsa-miR-20a	1	BAG4
hsa-miR-20a	1	PTEN
hsa-miR-20a	1	BID
hsa-miR-20a	1	CAPN2
hsa-miR-20a	1	TNFSF10
hsa-miR-20a	1	RNF8
hsa-miR-20a	1	CASP6
hsa-miR-20a	1	PIK3CD
hsa-miR-20a	1	TNFRSF10B
hsa-miR-20a	1	APP
hsa-miR-20a	1	IL1RAP
hsa-miR-20a	1	MAP3K14
hsa-miR-20a	1	TNFRSF10A
hsa-miR-20a	1	VEGFA
hsa-miR-20a	1	CASP8
hsa-miR-20a	1	MCL1
hsa-miR-20a	1	APC
hsa-miR-20a	1	CHUK
hsa-miR-20a	1	IRAK4
hsa-miR-20a	1	PPP3CA
hsa-miR-20a	1	PPP3CB
hsa-miR-20a	1	E2F1
hsa-miR-20a	1	TRAF4
hsa-miR-20a	1	DFFA
hsa-miR-20a	1	MAP3K7
hsa-miR-20a	1	CCND1
hsa-miR-20a	1	PIK3CA
hsa-miR-20a	1	PRKACB
hsa-miR-20a	1	CDKN1A
hsa-miR-20a	1	NOD1
hsa-miR-20a	1	DEDD2
hsa-miR-20a	1	CASP10
hsa-miR-20a	1	IRAK3
hsa-miR-20a	1	TANK
hsa-miR-20a	1	MSH2
hsa-miR-20a	1	FASLG
hsa-miR-20a	1	CHP2
hsa-miR-20a	1	TNFRSF10D
hsa-miR-20a	1	UBC
hsa-miR-20a	1	FGFR1
hsa-miR-20a	1	PRKAR2B
hsa-miR-20a	1	MFN2
hsa-miR-20a	1	AKT3
hsa-miR-20a	1	BAD
hsa-miR-20a	1	PARP1
hsa-miR-20a	1	IL10
hsa-miR-21	1	EGFR
hsa-miR-21	1	PPP3R1
hsa-miR-21	1	APAF1
hsa-miR-21	1	FAS
hsa-miR-21	1	PCNA
hsa-miR-21	1	CAPN2
hsa-miR-21	1	MSH2
hsa-miR-21	1	RTN4
hsa-miR-21	1	PIK3R1
hsa-miR-21	1	CASP6
hsa-miR-21	1	SP1
hsa-miR-21	1	TNFRSF10B
hsa-miR-21	1	IL1RAP
hsa-miR-21	1	IGFBP3
hsa-miR-21	1	CASP8
hsa-miR-21	1	CHUK
hsa-miR-21	1	PPP3CA
hsa-miR-21	1	PIK3R3
hsa-miR-21	1	IL1B
hsa-miR-21	1	PIK3CA
hsa-miR-21	1	TNFRSF6B
hsa-miR-21	1	IKBKG
hsa-miR-21	1	FASLG
hsa-miR-21	1	TNFRSF10D
hsa-miR-21	1	BRCA2
hsa-miR-21	1	MALT1
hsa-miR-21	1	RPS27A
hsa-miR-21	1	CARD8
hsa-miR-21	1	MAPK1
hsa-miR-21	1	IL10
hsa-miR-22	1	PPP3R1
hsa-miR-22	1	FAS
hsa-miR-22	1	CRADD
hsa-miR-22	1	NRAS
hsa-miR-22	1	EXOG
hsa-miR-22	1	TNFRSF1B
hsa-miR-22	1	IKBKB
hsa-miR-22	1	DFFB
hsa-miR-22	1	RELA
hsa-miR-22	1	BAG5
hsa-miR-22	1	IL1R1
hsa-miR-22	1	PTEN
hsa-miR-22	1	BAX
hsa-miR-22	1	TP53
hsa-miR-22	1	MAP3K7
hsa-miR-22	1	CDKN1A
hsa-miR-22	1	FGFR1
hsa-miR-22	1	CASP10
hsa-miR-22	1	PML
hsa-miR-22	1	CAPN1
hsa-miR-22	1	TNFRSF10D
hsa-miR-22	1	KAT5
hsa-miR-22	1	AKT3
hsa-miR-22	1	ATM
hsa-miR-22	1	AIFM1
hsa-miR-22	1	CFLAR
hsa-miR-22	1	PSEN1
hsa-miR-22	1	MAPK1
hsa-miR-23a	1	FAS
hsa-miR-23a	1	MITF
hsa-miR-23a	1	DEDD
hsa-miR-23a	1	MDM2
hsa-miR-23a	1	APAF1
hsa-miR-23a	1	IL6
hsa-miR-23a	1	BCL2L13
hsa-miR-23a	1	BNIP3L
hsa-miR-23a	1	CASP7
hsa-miR-23a	1	NFKB1
hsa-miR-23a	1	KRAS
hsa-miR-23a	1	BCL6
hsa-miR-23a	1	CARD8
hsa-miR-23a	1	CDKN2A
hsa-miR-23a	1	CAPN2
hsa-miR-23a	1	BCL2
hsa-miR-23a	1	CDC6
hsa-miR-23a	1	MYD88
hsa-miR-23a	1	SP1
hsa-miR-23a	1	PRKACB
hsa-miR-23a	1	TNFRSF10B
hsa-miR-23a	1	IL1RAP
hsa-miR-23a	1	VEGFA
hsa-miR-23a	1	CHUK
hsa-miR-23a	1	PTEN
hsa-miR-23a	1	IRAK4
hsa-miR-23a	1	CASP3
hsa-miR-23a	1	PPP3CA
hsa-miR-23a	1	PPP3CB
hsa-miR-23a	1	PIK3R3
hsa-miR-23a	1	CCND1
hsa-miR-23a	1	CRADD
hsa-miR-23a	1	IRAK2
hsa-miR-23a	1	CYCS
hsa-miR-23a	1	ENDOD1
hsa-miR-23a	1	AKT2
hsa-miR-23a	1	DAPK1
hsa-miR-23a	1	ABCB1
hsa-miR-23a	1	IFNG
hsa-miR-23a	1	AKT3
hsa-miR-23a	1	CDKN1B
hsa-miR-24	1	DEDD
hsa-miR-24	1	PIK3R5
hsa-miR-24	1	TNF
hsa-miR-24	1	H2AFX
hsa-miR-24	1	BNIP3L
hsa-miR-24	1	PEA15
hsa-miR-24	1	EXOG
hsa-miR-24	1	MYD88
hsa-miR-24	1	CSF2RB
hsa-miR-24	1	PML
hsa-miR-24	1	SP1
hsa-miR-24	1	TNFRSF1A
hsa-miR-24	1	XIAP
hsa-miR-24	1	IL1R1
hsa-miR-24	1	BBC3
hsa-miR-24	1	TRAF1
hsa-miR-24	1	TP53
hsa-miR-24	1	PKMYT1
hsa-miR-24	1	PIK3R3
hsa-miR-24	1	MYC
hsa-miR-24	1	RIPK1
hsa-miR-24	1	DAPK1
hsa-miR-24	1	IL1A
hsa-miR-24	1	NOD1
hsa-miR-24	1	FASLG
hsa-miR-24	1	RELA
hsa-miR-24	1	BRCA1
hsa-miR-24	1	IL1RAP
hsa-miR-24	1	IFNG
hsa-miR-24	1	AIFM1
hsa-miR-24	1	CDKN1B
hsa-miR-24	1	CASP8
hsa-miR-24	1	PSEN1
hsa-miR-24	1	BAG3
hsa-miR-25	1	PRKAR1A
hsa-miR-25	1	NRAS
hsa-miR-25	1	FAS
hsa-miR-25	1	TRAF3
hsa-miR-25	1	PCNA
hsa-miR-25	1	TNFSF10
hsa-miR-25	1	DFFB
hsa-miR-25	1	PIK3R1
hsa-miR-25	1	CSF2RB
hsa-miR-25	1	BAK1
hsa-miR-25	1	IGFBP3
hsa-miR-25	1	MCL1
hsa-miR-25	1	PTEN
hsa-miR-25	1	PPP3CB
hsa-miR-25	1	PIK3R3
hsa-miR-25	1	MDM2
hsa-miR-25	1	DCC
hsa-miR-25	1	PRKACB
hsa-miR-25	1	DAPK1
hsa-miR-25	1	CASP9
hsa-miR-25	1	FASLG
hsa-miR-25	1	CHP2
hsa-miR-25	1	IL6
hsa-miR-25	1	PRKAR2B
hsa-miR-25	1	IFNG
hsa-miR-25	1	AIFM1
hsa-miR-26a	1	EGFR
hsa-miR-26a	1	PPP3R1
hsa-miR-26a	1	MITF
hsa-miR-26a	1	APAF1
hsa-miR-26a	1	IL6
hsa-miR-26a	1	NFKB1
hsa-miR-26a	1	TRAF3
hsa-miR-26a	1	BAG4
hsa-miR-26a	1	PCNA
hsa-miR-26a	1	BID
hsa-miR-26a	1	DFFB
hsa-miR-26a	1	CDC6
hsa-miR-26a	1	RNF8
hsa-miR-26a	1	IKBKB
hsa-miR-26a	1	PIK3CD
hsa-miR-26a	1	APP
hsa-miR-26a	1	BAK1
hsa-miR-26a	1	VEGFA
hsa-miR-26a	1	BFAR
hsa-miR-26a	1	MCL1
hsa-miR-26a	1	APC
hsa-miR-26a	1	CHUK
hsa-miR-26a	1	PTEN
hsa-miR-26a	1	CASP10
hsa-miR-26a	1	PPP3CB
hsa-miR-26a	1	ATM
hsa-miR-26a	1	PRKAR2A
hsa-miR-26a	1	TP53
hsa-miR-26a	1	PPP3R2
hsa-miR-26a	1	PRKACB
hsa-miR-26a	1	CRADD
hsa-miR-26a	1	CASP4
hsa-miR-26a	1	TANK
hsa-miR-26a	1	BIRC3
hsa-miR-26a	1	ENDOD1
hsa-miR-26a	1	DAPK1
hsa-miR-26a	1	BRCA2
hsa-miR-26a	1	MALT1
hsa-miR-26a	1	EXOG
hsa-miR-26a	1	BCL2L13
hsa-miR-26a	1	PRKAR2B
hsa-miR-26a	1	IFNG
hsa-miR-26a	1	CARD8
hsa-miR-26b	1	EGFR
hsa-miR-26b	1	PPP3R1
hsa-miR-26b	1	MITF
hsa-miR-26b	1	APAF1
hsa-miR-26b	1	IL6
hsa-miR-26b	1	PRKAR1A
hsa-miR-26b	1	FAS
hsa-miR-26b	1	NFKB1
hsa-miR-26b	1	TRAF3
hsa-miR-26b	1	BAG4
hsa-miR-26b	1	PCNA
hsa-miR-26b	1	BID
hsa-miR-26b	1	DFFB
hsa-miR-26b	1	CDC6
hsa-miR-26b	1	RNF8
hsa-miR-26b	1	IKBKB
hsa-miR-26b	1	CASP8
hsa-miR-26b	1	PIK3CD
hsa-miR-26b	1	TNFRSF10B
hsa-miR-26b	1	APP
hsa-miR-26b	1	IL1RAP
hsa-miR-26b	1	BAK1
hsa-miR-26b	1	BFAR
hsa-miR-26b	1	MCL1
hsa-miR-26b	1	APC
hsa-miR-26b	1	CHUK
hsa-miR-26b	1	PTEN
hsa-miR-26b	1	CASP10
hsa-miR-26b	1	PPP3CB
hsa-miR-26b	1	ATM
hsa-miR-26b	1	PRKAR2A
hsa-miR-26b	1	TP53
hsa-miR-26b	1	PPP3R2
hsa-miR-26b	1	PRKACB
hsa-miR-26b	1	CRADD
hsa-miR-26b	1	CASP4
hsa-miR-26b	1	TANK
hsa-miR-26b	1	IL1A
hsa-miR-26b	1	BIRC3
hsa-miR-26b	1	ENDOD1
hsa-miR-26b	1	DAPK1
hsa-miR-26b	1	BRCA2
hsa-miR-26b	1	MALT1
hsa-miR-26b	1	EXOG
hsa-miR-26b	1	BCL2L13
hsa-miR-26b	1	PRKAR2B
hsa-miR-26b	1	IFNG
hsa-miR-26b	1	CARD8
hsa-miR-27a	1	EGFR
hsa-miR-27a	1	FAS
hsa-miR-27a	1	APAF1
hsa-miR-27a	1	BCL2L13
hsa-miR-27a	1	CASP7
hsa-miR-27a	1	KRAS
hsa-miR-27a	1	PTEN
hsa-miR-27a	1	DFFB
hsa-miR-27a	1	RNF8
hsa-miR-27a	1	RTN4
hsa-miR-27a	1	APP
hsa-miR-27a	1	IL1RAP
hsa-miR-27a	1	BAK1
hsa-miR-27a	1	PSEN1
hsa-miR-27a	1	MCL1
hsa-miR-27a	1	BBC3
hsa-miR-27a	1	IRAK4
hsa-miR-27a	1	PPP3CA
hsa-miR-27a	1	TP53
hsa-miR-27a	1	RIPK1
hsa-miR-27a	1	PPP3R2
hsa-miR-27a	1	MSH2
hsa-miR-27a	1	NOD1
hsa-miR-27a	1	DAPK1
hsa-miR-27a	1	TANK
hsa-miR-27a	1	BIRC3
hsa-miR-27a	1	BAX
hsa-miR-27a	1	CHP2
hsa-miR-27a	1	PIK3R1
hsa-miR-27a	1	TNFRSF10D
hsa-miR-27a	1	DFFA
hsa-miR-27a	1	IFNG
hsa-miR-27a	1	CARD8
hsa-miR-27a	1	PRKX
hsa-miR-27a	1	CASP8
hsa-miR-28	1	IKBKB
hsa-miR-28	1	DEDD
hsa-miR-28	1	CRADD
hsa-miR-28	1	NRAS
hsa-miR-28	1	HTRA2
hsa-miR-28	1	CASP2
hsa-miR-28	1	DFFB
hsa-miR-28	1	PIK3R1
hsa-miR-28	1	BAG1
hsa-miR-28	1	SP1
hsa-miR-28	1	TNFRSF10B
hsa-miR-28	1	RARG
hsa-miR-28	1	PTEN
hsa-miR-28	1	CASP3
hsa-miR-28	1	PRKAR2A
hsa-miR-28	1	PIK3R3
hsa-miR-28	1	CDKN1A
hsa-miR-28	1	CASP4
hsa-miR-28	1	MAPK1
hsa-miR-28	1	FASLG
hsa-miR-28	1	RELA
hsa-miR-28	1	FADD
hsa-miR-28	1	EXOG
hsa-miR-28	1	PIK3R2
hsa-miR-29a	1	FAS
hsa-miR-29a	1	DEDD
hsa-miR-29a	1	MDM2
hsa-miR-29a	1	PRKAR1A
hsa-miR-29a	1	NRAS
hsa-miR-29a	1	CASP7
hsa-miR-29a	1	EXOG
hsa-miR-29a	1	BIRC2
hsa-miR-29a	1	PIK3R1
hsa-miR-29a	1	CASP2
hsa-miR-29a	1	TNFRSF10B
hsa-miR-29a	1	TNFRSF1A
hsa-miR-29a	1	IL1RAP
hsa-miR-29a	1	BAK1
hsa-miR-29a	1	VEGFA
hsa-miR-29a	1	CASP8
hsa-miR-29a	1	MCL1
hsa-miR-29a	1	APC
hsa-miR-29a	1	PTEN
hsa-miR-29a	1	BAX
hsa-miR-29a	1	CASP4
hsa-miR-29a	1	TRAF1
hsa-miR-29a	1	PRKACA
hsa-miR-29a	1	E2F1
hsa-miR-29a	1	TRAF4
hsa-miR-29a	1	PIK3R3
hsa-miR-29a	1	PPP3R2
hsa-miR-29a	1	MSH2
hsa-miR-29a	1	AKT2
hsa-miR-29a	1	IL6
hsa-miR-29a	1	ATM
hsa-miR-29a	1	FGFR1
hsa-miR-29a	1	RPS27A
hsa-miR-29a	1	IFNG
hsa-miR-29a	1	AKT3
hsa-miR-30a	1	PPP3R1
hsa-miR-30a	1	FAS
hsa-miR-30a	1	NAIP
hsa-miR-30a	1	PML
hsa-miR-30a	1	PRKAR1A
hsa-miR-30a	1	BNIP3L
hsa-miR-30a	1	BCL2L1
hsa-miR-30a	1	KRAS
hsa-miR-30a	1	BCL6
hsa-miR-30a	1	BAG4
hsa-miR-30a	1	PCNA
hsa-miR-30a	1	PTEN
hsa-miR-30a	1	BID
hsa-miR-30a	1	NFKBIA
hsa-miR-30a	1	RTN4
hsa-miR-30a	1	MYD88
hsa-miR-30a	1	BAG1
hsa-miR-30a	1	PIK3CD
hsa-miR-30a	1	TNFRSF10B
hsa-miR-30a	1	IL1RAP
hsa-miR-30a	1	RARG
hsa-miR-30a	1	VEGFA
hsa-miR-30a	1	APC
hsa-miR-30a	1	IRAK4
hsa-miR-30a	1	CASP3
hsa-miR-30a	1	PPP3CB
hsa-miR-30a	1	MAP3K7
hsa-miR-30a	1	PPP3R2
hsa-miR-30a	1	TANK
hsa-miR-30a	1	IL1A
hsa-miR-30a	1	TNFRSF10D
hsa-miR-30a	1	ABCB1
hsa-miR-30a	1	FGFR1
hsa-miR-30a	1	PIK3R2
hsa-miR-30a	1	AKT3
hsa-miR-30a	1	PRKACB
hsa-miR-31	1	NAIP
hsa-miR-31	1	PML
hsa-miR-31	1	BCL2L1
hsa-miR-31	1	CASP2
hsa-miR-31	1	IKBKB
hsa-miR-31	1	CARD8
hsa-miR-31	1	CDC6
hsa-miR-31	1	RTN4
hsa-miR-31	1	BAG1
hsa-miR-31	1	APP
hsa-miR-31	1	IL1RAP
hsa-miR-31	1	MAP3K14
hsa-miR-31	1	VEGFA
hsa-miR-31	1	IGFBP3
hsa-miR-31	1	IL1R1
hsa-miR-31	1	PPP3CA
hsa-miR-31	1	PPP3CB
hsa-miR-31	1	MYC
hsa-miR-31	1	PPP3R2
hsa-miR-31	1	PRKACB
hsa-miR-31	1	PCNA
hsa-miR-31	1	NOD1
hsa-miR-31	1	PRKAR1B
hsa-miR-31	1	TRADD
hsa-miR-31	1	MSH2
hsa-miR-31	1	PARP1
hsa-miR-32	1	PRKAR1A
hsa-miR-32	1	NRAS
hsa-miR-32	1	FAS
hsa-miR-32	1	TRAF3
hsa-miR-32	1	PCNA
hsa-miR-32	1	TNFSF10
hsa-miR-32	1	PIK3R1
hsa-miR-32	1	CSF2RB
hsa-miR-32	1	BAK1
hsa-miR-32	1	PPP3CC
hsa-miR-32	1	IGFBP3
hsa-miR-32	1	MCL1
hsa-miR-32	1	PTEN
hsa-miR-32	1	PPP3CB
hsa-miR-32	1	PIK3R3
hsa-miR-32	1	DCC
hsa-miR-32	1	PPP3R2
hsa-miR-32	1	PRKACB
hsa-miR-32	1	IRAK3
hsa-miR-32	1	CYCS
hsa-miR-32	1	DAPK1
hsa-miR-32	1	CASP9
hsa-miR-32	1	FASLG
hsa-miR-32	1	CHP2
hsa-miR-32	1	IL6
hsa-miR-32	1	PRKAR2B
hsa-miR-32	1	IFNG
hsa-miR-32	1	AIFM1
hsa-miR-32	1	MDM2
hsa-miR-33a	1	DEDD
hsa-miR-33a	1	TNF
hsa-miR-33a	1	IL1RAP
hsa-miR-33a	1	TRAF3
hsa-miR-33a	1	PCNA
hsa-miR-33a	1	RTN4
hsa-miR-33a	1	FAS
hsa-miR-33a	1	CASP8
hsa-miR-33a	1	XIAP
hsa-miR-33a	1	MCL1
hsa-miR-33a	1	APC
hsa-miR-33a	1	PPP3CA
hsa-miR-33a	1	PPP3CB
hsa-miR-33a	1	PIK3R3
hsa-miR-33a	1	MAP3K7
hsa-miR-33a	1	PPP3R2
hsa-miR-33a	1	PML
hsa-miR-33a	1	ENDOD1
hsa-miR-33a	1	EGFR
hsa-miR-33a	1	EXOG
hsa-miR-33a	1	MSH2
hsa-miR-33a	1	RPS27A
hsa-miR-33a	1	HRK
hsa-miR-33a	1	TNFSF10
hsa-miR-33a	1	AIFM1
hsa-miR-33a	1	PRKX
hsa-miR-33a	1	PARP1
hsa-miR-33a	1	NLRP1
hsa-miR-92a	1	PRKAR1A
hsa-miR-92a	1	NRAS
hsa-miR-92a	1	FAS
hsa-miR-92a	1	TRAF3
hsa-miR-92a	1	PCNA
hsa-miR-92a	1	PIK3R1
hsa-miR-92a	1	CSF2RB
hsa-miR-92a	1	BAK1
hsa-miR-92a	1	IGFBP3
hsa-miR-92a	1	MCL1
hsa-miR-92a	1	PTEN
hsa-miR-92a	1	PPP3CB
hsa-miR-92a	1	PIK3R3
hsa-miR-92a	1	MDM2
hsa-miR-92a	1	DCC
hsa-miR-92a	1	PRKACB
hsa-miR-92a	1	DAPK1
hsa-miR-92a	1	CASP9
hsa-miR-92a	1	FASLG
hsa-miR-92a	1	CHP2
hsa-miR-92a	1	IL6
hsa-miR-92a	1	PRKAR2B
hsa-miR-92a	1	IFNG
hsa-miR-92a	1	AIFM1
hsa-miR-93	1	PPP3R1
hsa-miR-93	1	DEDD
hsa-miR-93	1	TNF
hsa-miR-93	1	PKMYT1
hsa-miR-93	1	NAIP
hsa-miR-93	1	IL6
hsa-miR-93	1	PRKAR1A
hsa-miR-93	1	BNIP3L
hsa-miR-93	1	CFLAR
hsa-miR-93	1	CASP7
hsa-miR-93	1	HTRA2
hsa-miR-93	1	KRAS
hsa-miR-93	1	CASP2
hsa-miR-93	1	BCL6
hsa-miR-93	1	CARD8
hsa-miR-93	1	BID
hsa-miR-93	1	CAPN2
hsa-miR-93	1	TNFSF10
hsa-miR-93	1	RNF8
hsa-miR-93	1	CASP6
hsa-miR-93	1	BAG5
hsa-miR-93	1	TNFRSF10B
hsa-miR-93	1	APP
hsa-miR-93	1	IL1RAP
hsa-miR-93	1	MAP3K14
hsa-miR-93	1	TNFRSF10A
hsa-miR-93	1	VEGFA
hsa-miR-93	1	CASP8
hsa-miR-93	1	MCL1
hsa-miR-93	1	APC
hsa-miR-93	1	CHUK
hsa-miR-93	1	PTEN
hsa-miR-93	1	IRAK4
hsa-miR-93	1	PPP3CA
hsa-miR-93	1	PPP3CB
hsa-miR-93	1	E2F1
hsa-miR-93	1	TRAF4
hsa-miR-93	1	DFFA
hsa-miR-93	1	RIPK1
hsa-miR-93	1	MAP3K7
hsa-miR-93	1	CCND1
hsa-miR-93	1	PIK3CA
hsa-miR-93	1	PRKACB
hsa-miR-93	1	CDKN1A
hsa-miR-93	1	NOD1
hsa-miR-93	1	CASP10
hsa-miR-93	1	IRAK3
hsa-miR-93	1	TANK
hsa-miR-93	1	MSH2
hsa-miR-93	1	FASLG
hsa-miR-93	1	CHP2
hsa-miR-93	1	TNFRSF10D
hsa-miR-93	1	UBC
hsa-miR-93	1	ATM
hsa-miR-93	1	FGFR1
hsa-miR-93	1	PRKAR2B
hsa-miR-93	1	MFN2
hsa-miR-93	1	IFNG
hsa-miR-93	1	AKT3
hsa-miR-93	1	BAD
hsa-miR-93	1	PARP1
hsa-miR-93	1	IL10
hsa-miR-96	1	PPP3R1
hsa-miR-96	1	CASP9
hsa-miR-96	1	MITF
hsa-miR-96	1	TNF
hsa-miR-96	1	PRKAR1A
hsa-miR-96	1	NRAS
hsa-miR-96	1	KRAS
hsa-miR-96	1	CASP2
hsa-miR-96	1	BAG4
hsa-miR-96	1	RNF8
hsa-miR-96	1	RTN4
hsa-miR-96	1	PIK3R1
hsa-miR-96	1	CASP8
hsa-miR-96	1	RARG
hsa-miR-96	1	APC
hsa-miR-96	1	PPP3CA
hsa-miR-96	1	CCND1
hsa-miR-96	1	FGFR1
hsa-miR-96	1	PPP3R2
hsa-miR-96	1	NOD1
hsa-miR-96	1	IL1A
hsa-miR-96	1	IKBKG
hsa-miR-96	1	PRKAR2B
hsa-miR-96	1	MDM2
hsa-miR-96	1	CDKN1B
hsa-miR-96	1	TNFRSF10C
hsa-miR-98	1	PPP3R1
hsa-miR-98	1	FAS
hsa-miR-98	1	DAPK1
hsa-miR-98	1	IL6
hsa-miR-98	1	BNIP3L
hsa-miR-98	1	NRAS
hsa-miR-98	1	NGF
hsa-miR-98	1	BCL2L1
hsa-miR-98	1	UBA52
hsa-miR-98	1	PCNA
hsa-miR-98	1	TNFRSF1B
hsa-miR-98	1	TNFSF10
hsa-miR-98	1	RNF8
hsa-miR-98	1	MYD88
hsa-miR-98	1	BAG1
hsa-miR-98	1	BFAR
hsa-miR-98	1	CHUK
hsa-miR-98	1	CASP3
hsa-miR-98	1	TP53
hsa-miR-98	1	CASP10
hsa-miR-98	1	MYC
hsa-miR-98	1	PRKACB
hsa-miR-98	1	CDKN1A
hsa-miR-98	1	IRAK2
hsa-miR-98	1	BAX
hsa-miR-98	1	AKT2
hsa-miR-98	1	FASLG
hsa-miR-98	1	AKT3
hsa-miR-98	1	AIFM1
hsa-miR-98	1	CDKN1B
hsa-miR-98	1	PARP1
hsa-miR-98	1	IL10
hsa-miR-99a	1	PPP3CA
hsa-miR-99a	1	TNFRSF1A
hsa-miR-100	1	IRAK4
hsa-miR-100	1	PPP3CA
hsa-miR-101	1	DAXX
hsa-miR-101	1	PPP3R1
hsa-miR-101	1	MITF
hsa-miR-101	1	APAF1
hsa-miR-101	1	BNIP3L
hsa-miR-101	1	IL1RAP
hsa-miR-101	1	NRAS
hsa-miR-101	1	CARD8
hsa-miR-101	1	PTEN
hsa-miR-101	1	BID
hsa-miR-101	1	CAPN2
hsa-miR-101	1	NFKBIA
hsa-miR-101	1	RNF8
hsa-miR-101	1	RTN4
hsa-miR-101	1	BAG1
hsa-miR-101	1	RELA
hsa-miR-101	1	CASP8AP2
hsa-miR-101	1	NAIP
hsa-miR-101	1	APP
hsa-miR-101	1	VEGFA
hsa-miR-101	1	MCL1
hsa-miR-101	1	APC
hsa-miR-101	1	IL1R1
hsa-miR-101	1	CASP3
hsa-miR-101	1	PPP3CB
hsa-miR-101	1	CASP10
hsa-miR-101	1	ATM
hsa-miR-101	1	RIPK1
hsa-miR-101	1	MAP3K7
hsa-miR-101	1	CDKN1A
hsa-miR-101	1	MSH2
hsa-miR-101	1	DAPK1
hsa-miR-101	1	TANK
hsa-miR-101	1	CASP9
hsa-miR-101	1	FGFR1
hsa-miR-101	1	EXOG
hsa-miR-101	1	TNFRSF1A
hsa-miR-101	1	IFNG
hsa-miR-101	1	AKT3
hsa-miR-101	1	FAS
hsa-miR-101	1	PRKX
hsa-miR-101	1	MAPK1
hsa-miR-29b	1	PPP3R1
hsa-miR-29b	1	FAS
hsa-miR-29b	1	DEDD
hsa-miR-29b	1	MDM2
hsa-miR-29b	1	PRKAR1A
hsa-miR-29b	1	NRAS
hsa-miR-29b	1	CASP7
hsa-miR-29b	1	EXOG
hsa-miR-29b	1	BIRC2
hsa-miR-29b	1	PIK3R1
hsa-miR-29b	1	CASP2
hsa-miR-29b	1	TNFRSF10B
hsa-miR-29b	1	TNFRSF1A
hsa-miR-29b	1	IL1RAP
hsa-miR-29b	1	BAK1
hsa-miR-29b	1	VEGFA
hsa-miR-29b	1	PSEN1
hsa-miR-29b	1	CASP8
hsa-miR-29b	1	MCL1
hsa-miR-29b	1	APC
hsa-miR-29b	1	PTEN
hsa-miR-29b	1	BAX
hsa-miR-29b	1	CASP4
hsa-miR-29b	1	TRAF1
hsa-miR-29b	1	E2F1
hsa-miR-29b	1	TRAF4
hsa-miR-29b	1	PIK3R3
hsa-miR-29b	1	RIPK1
hsa-miR-29b	1	PPP3R2
hsa-miR-29b	1	MSH2
hsa-miR-29b	1	NOD1
hsa-miR-29b	1	AKT2
hsa-miR-29b	1	IL6
hsa-miR-29b	1	ATM
hsa-miR-29b	1	FGFR1
hsa-miR-29b	1	RPS27A
hsa-miR-29b	1	IFNG
hsa-miR-29b	1	AKT3
hsa-miR-29b	1	HRAS
hsa-miR-103	1	MITF
hsa-miR-103	1	PIK3R5
hsa-miR-103	1	TNF
hsa-miR-103	1	BAK1
hsa-miR-103	1	BCL2L13
hsa-miR-103	1	PRKAR1A
hsa-miR-103	1	CRADD
hsa-miR-103	1	EGFR
hsa-miR-103	1	PTEN
hsa-miR-103	1	CAPN2
hsa-miR-103	1	RNF8
hsa-miR-103	1	PIK3R1
hsa-miR-103	1	IL1RAP
hsa-miR-103	1	VEGFA
hsa-miR-103	1	APC
hsa-miR-103	1	CASP3
hsa-miR-103	1	PPP3CB
hsa-miR-103	1	MAP3K7
hsa-miR-103	1	PCNA
hsa-miR-103	1	NOD1
hsa-miR-103	1	IKBKG
hsa-miR-103	1	CFLAR
hsa-miR-103	1	IL6
hsa-miR-103	1	PRKAR2B
hsa-miR-103	1	MFN2
hsa-miR-103	1	AKT3
hsa-miR-103	1	AIFM1
hsa-miR-103	1	CASP8
hsa-miR-103	1	PSEN1
hsa-miR-103	1	PARP1
hsa-miR-106a	1	PPP3R1
hsa-miR-106a	1	FAS
hsa-miR-106a	1	DEDD
hsa-miR-106a	1	TNF
hsa-miR-106a	1	PKMYT1
hsa-miR-106a	1	NAIP
hsa-miR-106a	1	IL6
hsa-miR-106a	1	PRKAR1A
hsa-miR-106a	1	BNIP3L
hsa-miR-106a	1	CFLAR
hsa-miR-106a	1	CASP7
hsa-miR-106a	1	HTRA2
hsa-miR-106a	1	CASP2
hsa-miR-106a	1	BCL6
hsa-miR-106a	1	CARD8
hsa-miR-106a	1	BID
hsa-miR-106a	1	CAPN2
hsa-miR-106a	1	TNFSF10
hsa-miR-106a	1	RNF8
hsa-miR-106a	1	CASP6
hsa-miR-106a	1	PIK3CD
hsa-miR-106a	1	TNFRSF10B
hsa-miR-106a	1	APP
hsa-miR-106a	1	IL1RAP
hsa-miR-106a	1	MAP3K14
hsa-miR-106a	1	TNFRSF10A
hsa-miR-106a	1	VEGFA
hsa-miR-106a	1	CASP8
hsa-miR-106a	1	MCL1
hsa-miR-106a	1	APC
hsa-miR-106a	1	CHUK
hsa-miR-106a	1	PTEN
hsa-miR-106a	1	IRAK4
hsa-miR-106a	1	PPP3CA
hsa-miR-106a	1	PPP3CB
hsa-miR-106a	1	E2F1
hsa-miR-106a	1	TRAF4
hsa-miR-106a	1	DFFA
hsa-miR-106a	1	MAP3K7
hsa-miR-106a	1	CCND1
hsa-miR-106a	1	PIK3CA
hsa-miR-106a	1	PRKACB
hsa-miR-106a	1	CDKN1A
hsa-miR-106a	1	NOD1
hsa-miR-106a	1	DEDD2
hsa-miR-106a	1	CASP10
hsa-miR-106a	1	IRAK3
hsa-miR-106a	1	TANK
hsa-miR-106a	1	MSH2
hsa-miR-106a	1	FASLG
hsa-miR-106a	1	CHP2
hsa-miR-106a	1	TNFRSF10D
hsa-miR-106a	1	UBC
hsa-miR-106a	1	FGFR1
hsa-miR-106a	1	RPS27A
hsa-miR-106a	1	PRKAR2B
hsa-miR-106a	1	MFN2
hsa-miR-106a	1	AKT3
hsa-miR-106a	1	BAD
hsa-miR-106a	1	PARP1
hsa-miR-106a	1	IL10
hsa-miR-107	1	MITF
hsa-miR-107	1	PIK3R5
hsa-miR-107	1	TNF
hsa-miR-107	1	BAK1
hsa-miR-107	1	BCL2L13
hsa-miR-107	1	PRKAR1A
hsa-miR-107	1	CRADD
hsa-miR-107	1	EGFR
hsa-miR-107	1	PTEN
hsa-miR-107	1	CAPN2
hsa-miR-107	1	RNF8
hsa-miR-107	1	PIK3R1
hsa-miR-107	1	IL1RAP
hsa-miR-107	1	VEGFA
hsa-miR-107	1	APC
hsa-miR-107	1	CASP3
hsa-miR-107	1	PPP3CB
hsa-miR-107	1	MAP3K7
hsa-miR-107	1	PCNA
hsa-miR-107	1	NOD1
hsa-miR-107	1	IKBKG
hsa-miR-107	1	CFLAR
hsa-miR-107	1	IL6
hsa-miR-107	1	PRKAR2B
hsa-miR-107	1	MFN2
hsa-miR-107	1	AKT3
hsa-miR-107	1	AIFM1
hsa-miR-107	1	CASP8
hsa-miR-107	1	PSEN1
hsa-miR-107	1	PARP1
hsa-miR-192	1	PRKAR1A
hsa-miR-192	1	UBA52
hsa-miR-192	1	AIFM1
hsa-miR-192	1	RNF8
hsa-miR-192	1	BAG1
hsa-miR-192	1	CASP8AP2
hsa-miR-192	1	SP1
hsa-miR-192	1	IL1RAP
hsa-miR-192	1	XIAP
hsa-miR-192	1	MCL1
hsa-miR-192	1	PRKACB
hsa-miR-192	1	FGFR1
hsa-miR-192	1	IRAK1
hsa-miR-192	1	CYCS
hsa-miR-192	1	FASLG
hsa-miR-192	1	MALT1
hsa-miR-192	1	ATM
hsa-miR-192	1	MAPK1
hsa-miR-196a	1	PPP3R1
hsa-miR-196a	1	FAS
hsa-miR-196a	1	APAF1
hsa-miR-196a	1	PRKAR1A
hsa-miR-196a	1	NRAS
hsa-miR-196a	1	NFKBIA
hsa-miR-196a	1	CASP8
hsa-miR-196a	1	BBC3
hsa-miR-196a	1	CHUK
hsa-miR-196a	1	PPP3CB
hsa-miR-196a	1	DFFA
hsa-miR-196a	1	MAP3K7
hsa-miR-196a	1	IL1A
hsa-miR-196a	1	CASP1
hsa-miR-196a	1	FASLG
hsa-miR-196a	1	TRAF6
hsa-miR-196a	1	CFLAR
hsa-miR-196a	1	AKT3
hsa-miR-196a	1	CDKN1B
hsa-miR-197	1	PPP3R1
hsa-miR-197	1	IKBKB
hsa-miR-197	1	IL1RAP
hsa-miR-197	1	CASP7
hsa-miR-197	1	PKMYT1
hsa-miR-197	1	TNFSF10
hsa-miR-197	1	BIRC2
hsa-miR-197	1	BAG1
hsa-miR-197	1	PML
hsa-miR-197	1	IGFBP3
hsa-miR-197	1	MCL1
hsa-miR-197	1	CHUK
hsa-miR-197	1	CASP3
hsa-miR-197	1	CASP4
hsa-miR-197	1	PPP3CA
hsa-miR-197	1	PPP3CB
hsa-miR-197	1	E2F1
hsa-miR-197	1	ENDOG
hsa-miR-197	1	DCC
hsa-miR-197	1	RIPK1
hsa-miR-197	1	PPP3R2
hsa-miR-197	1	MSH2
hsa-miR-197	1	IRAK2
hsa-miR-197	1	KAT5
hsa-miR-197	1	FGFR1
hsa-miR-197	1	BCL2L13
hsa-miR-197	1	TNFRSF1A
hsa-miR-197	1	RPS27A
hsa-miR-197	1	MFN2
hsa-miR-197	1	CFLAR
hsa-miR-197	1	CASP8
hsa-miR-197	1	MAPK1
hsa-miR-197	1	PARP1
hsa-miR-197	1	BIRC5
hsa-miR-199a	1	MITF
hsa-miR-199a	1	BNIP3L
hsa-miR-199a	1	CRADD
hsa-miR-199a	1	NFKB1
hsa-miR-199a	1	HTRA2
hsa-miR-199a	1	KRAS
hsa-miR-199a	1	BID
hsa-miR-199a	1	IKBKB
hsa-miR-199a	1	BRCA1
hsa-miR-199a	1	DFFB
hsa-miR-199a	1	CDC6
hsa-miR-199a	1	PIK3R1
hsa-miR-199a	1	BAG1
hsa-miR-199a	1	SP1
hsa-miR-199a	1	PIK3CD
hsa-miR-199a	1	APP
hsa-miR-199a	1	IL1RAP
hsa-miR-199a	1	VEGFA
hsa-miR-199a	1	IRAK4
hsa-miR-199a	1	CASP4
hsa-miR-199a	1	DAPK1
hsa-miR-199a	1	ENDOD1
hsa-miR-199a	1	FASLG
hsa-miR-199a	1	MALT1
hsa-miR-199a	1	EXOG
hsa-miR-199a	1	CARD8
hsa-miR-199a	1	AIFM1
hsa-miR-199a	1	CDKN1B
hsa-miR-208a	1	PRKAR1A
hsa-miR-208a	1	NFKBIA
hsa-miR-208a	1	APC
hsa-miR-208a	1	CHUK
hsa-miR-208a	1	PPP3CA
hsa-miR-208a	1	PPP3CB
hsa-miR-208a	1	DFFA
hsa-miR-208a	1	BCL2L13
hsa-miR-208a	1	PARP1
hsa-miR-129	1	FAS
hsa-miR-129	1	IL1RAP
hsa-miR-129	1	CASP7
hsa-miR-129	1	NFKB1
hsa-miR-129	1	KRAS
hsa-miR-129	1	PEA15
hsa-miR-129	1	EXOG
hsa-miR-129	1	IKBKB
hsa-miR-129	1	TRAF3
hsa-miR-129	1	BFAR
hsa-miR-129	1	BCL6
hsa-miR-129	1	PTEN
hsa-miR-129	1	CAPN2
hsa-miR-129	1	TNFSF10
hsa-miR-129	1	NFKBIA
hsa-miR-129	1	RNF8
hsa-miR-129	1	RTN4
hsa-miR-129	1	PIK3R1
hsa-miR-129	1	CASP6
hsa-miR-129	1	PRKACB
hsa-miR-129	1	NAIP
hsa-miR-129	1	RARG
hsa-miR-129	1	TNFRSF10A
hsa-miR-129	1	CASP8
hsa-miR-129	1	APC
hsa-miR-129	1	IRAK4
hsa-miR-129	1	PPP3CA
hsa-miR-129	1	EGFR
hsa-miR-129	1	PPP3CB
hsa-miR-129	1	DFFA
hsa-miR-129	1	DCC
hsa-miR-129	1	MAP3K7
hsa-miR-129	1	PIK3CA
hsa-miR-129	1	FGFR1
hsa-miR-129	1	PSEN1
hsa-miR-129	1	IRAK3
hsa-miR-129	1	TANK
hsa-miR-129	1	BIRC3
hsa-miR-129	1	ENDOD1
hsa-miR-129	1	BAD
hsa-miR-129	1	NLRP1
hsa-miR-129	1	FADD
hsa-miR-129	1	IL3
hsa-miR-129	1	VEGFA
hsa-miR-129	1	CASP1
hsa-miR-129	1	BRCA2
hsa-miR-129	1	ABCB1
hsa-miR-129	1	KAT5
hsa-miR-129	1	MSH2
hsa-miR-129	1	PRKX
hsa-miR-129	1	MAPK1
hsa-miR-148a	1	PPP3R1
hsa-miR-148a	1	MITF
hsa-miR-148a	1	IKBKB
hsa-miR-148a	1	DEDD
hsa-miR-148a	1	TNF
hsa-miR-148a	1	BCL2L13
hsa-miR-148a	1	BNIP3L
hsa-miR-148a	1	NRAS
hsa-miR-148a	1	EGFR
hsa-miR-148a	1	PEA15
hsa-miR-148a	1	BCL6
hsa-miR-148a	1	BID
hsa-miR-148a	1	TNFRSF1B
hsa-miR-148a	1	CAPN2
hsa-miR-148a	1	BIRC2
hsa-miR-148a	1	RTN4
hsa-miR-148a	1	PIK3R1
hsa-miR-148a	1	RARG
hsa-miR-148a	1	VEGFA
hsa-miR-148a	1	CASP8
hsa-miR-148a	1	CHUK
hsa-miR-148a	1	PTEN
hsa-miR-148a	1	DIABLO
hsa-miR-148a	1	PPP3CA
hsa-miR-148a	1	E2F1
hsa-miR-148a	1	PIK3R3
hsa-miR-148a	1	PIK3CA
hsa-miR-148a	1	TNFRSF6B
hsa-miR-148a	1	DEDD2
hsa-miR-148a	1	PRKAR2A
hsa-miR-148a	1	ENDOD1
hsa-miR-148a	1	BRCA2
hsa-miR-148a	1	MFN2
hsa-miR-148a	1	PRKX
hsa-miR-148a	1	CDKN1B
hsa-miR-148a	1	BAG3
hsa-miR-148a	1	PARP1
hsa-miR-30c	1	PPP3R1
hsa-miR-30c	1	FAS
hsa-miR-30c	1	MITF
hsa-miR-30c	1	NAIP
hsa-miR-30c	1	PML
hsa-miR-30c	1	PRKAR1A
hsa-miR-30c	1	BNIP3L
hsa-miR-30c	1	BCL2L1
hsa-miR-30c	1	KRAS
hsa-miR-30c	1	EXOG
hsa-miR-30c	1	BCL6
hsa-miR-30c	1	BAG4
hsa-miR-30c	1	PCNA
hsa-miR-30c	1	PTEN
hsa-miR-30c	1	BID
hsa-miR-30c	1	RTN4
hsa-miR-30c	1	MYD88
hsa-miR-30c	1	BAG1
hsa-miR-30c	1	PIK3CD
hsa-miR-30c	1	TNFRSF10B
hsa-miR-30c	1	IL1RAP
hsa-miR-30c	1	RARG
hsa-miR-30c	1	VEGFA
hsa-miR-30c	1	APC
hsa-miR-30c	1	BBC3
hsa-miR-30c	1	CASP3
hsa-miR-30c	1	PPP3CB
hsa-miR-30c	1	ATM
hsa-miR-30c	1	MAP3K7
hsa-miR-30c	1	PPP3R2
hsa-miR-30c	1	TANK
hsa-miR-30c	1	IL1A
hsa-miR-30c	1	TNFRSF10D
hsa-miR-30c	1	ABCB1
hsa-miR-30c	1	FGFR1
hsa-miR-30c	1	PIK3R2
hsa-miR-30c	1	AKT3
hsa-miR-30c	1	PRKACB
hsa-miR-30d	1	PPP3R1
hsa-miR-30d	1	FAS
hsa-miR-30d	1	NAIP
hsa-miR-30d	1	PML
hsa-miR-30d	1	PRKAR1A
hsa-miR-30d	1	BNIP3L
hsa-miR-30d	1	BCL2L1
hsa-miR-30d	1	KRAS
hsa-miR-30d	1	BCL6
hsa-miR-30d	1	BAG4
hsa-miR-30d	1	PCNA
hsa-miR-30d	1	PTEN
hsa-miR-30d	1	BID
hsa-miR-30d	1	RTN4
hsa-miR-30d	1	MYD88
hsa-miR-30d	1	BAG1
hsa-miR-30d	1	PIK3CD
hsa-miR-30d	1	TNFRSF10B
hsa-miR-30d	1	IL1RAP
hsa-miR-30d	1	RARG
hsa-miR-30d	1	VEGFA
hsa-miR-30d	1	APC
hsa-miR-30d	1	CASP3
hsa-miR-30d	1	PPP3CB
hsa-miR-30d	1	MAP3K7
hsa-miR-30d	1	PPP3R2
hsa-miR-30d	1	TANK
hsa-miR-30d	1	IL1A
hsa-miR-30d	1	CASP9
hsa-miR-30d	1	TNFRSF10D
hsa-miR-30d	1	ABCB1
hsa-miR-30d	1	FGFR1
hsa-miR-30d	1	PIK3R2
hsa-miR-30d	1	AKT3
hsa-miR-30d	1	PRKACB
hsa-miR-139	1	PPP3R1
hsa-miR-139	1	PIK3CG
hsa-miR-139	1	BNIP3L
hsa-miR-139	1	IL1RAP
hsa-miR-139	1	TNFSF10
hsa-miR-139	1	RTN4
hsa-miR-139	1	IKBKB
hsa-miR-139	1	BAG5
hsa-miR-139	1	APP
hsa-miR-139	1	MCL1
hsa-miR-139	1	APC
hsa-miR-139	1	PTEN
hsa-miR-139	1	CASP3
hsa-miR-139	1	CASP4
hsa-miR-139	1	PPP3CB
hsa-miR-139	1	PRKAR2A
hsa-miR-139	1	PRKACB
hsa-miR-139	1	MSH2
hsa-miR-139	1	CYCS
hsa-miR-139	1	ENDOD1
hsa-miR-139	1	TNFRSF10D
hsa-miR-139	1	CASP1
hsa-miR-139	1	IL6
hsa-miR-139	1	TGFB1
hsa-miR-139	1	RPS27A
hsa-miR-139	1	AKT3
hsa-miR-139	1	CDKN1B
hsa-miR-139	1	BCL2L13
hsa-miR-7	1	CASP9
hsa-miR-7	1	DEDD
hsa-miR-7	1	BNIP3L
hsa-miR-7	1	NRAS
hsa-miR-7	1	TRAF3
hsa-miR-7	1	CAPN2
hsa-miR-7	1	BRCA1
hsa-miR-7	1	RARG
hsa-miR-7	1	RELA
hsa-miR-7	1	SP1
hsa-miR-7	1	PRKACB
hsa-miR-7	1	PIK3CD
hsa-miR-7	1	APP
hsa-miR-7	1	PSEN1
hsa-miR-7	1	APC
hsa-miR-7	1	IRAK4
hsa-miR-7	1	CASP1
hsa-miR-7	1	EGFR
hsa-miR-7	1	PRKAR2A
hsa-miR-7	1	PIK3R3
hsa-miR-7	1	IKBKG
hsa-miR-7	1	NOD1
hsa-miR-7	1	BAD
hsa-miR-7	1	CASP8
hsa-miR-7	1	MAPK1
hsa-miR-7	1	PARP1
hsa-miR-10a	1	DEDD
hsa-miR-10a	1	EGFR
hsa-miR-10a	1	UBA52
hsa-miR-10a	1	HTRA2
hsa-miR-10a	1	PEA15
hsa-miR-10a	1	CASP2
hsa-miR-10a	1	BCL6
hsa-miR-10a	1	CARD8
hsa-miR-10a	1	CDC6
hsa-miR-10a	1	SP1
hsa-miR-10a	1	PIK3CD
hsa-miR-10a	1	CASP8
hsa-miR-10a	1	PTEN
hsa-miR-10a	1	IRAK4
hsa-miR-10a	1	PPP3CB
hsa-miR-10a	1	PRKACA
hsa-miR-10a	1	PRKAR2A
hsa-miR-10a	1	PIK3R3
hsa-miR-10a	1	MAP3K7
hsa-miR-10a	1	PIK3CA
hsa-miR-10a	1	DFFB
hsa-miR-10a	1	PCNA
hsa-miR-10a	1	CRADD
hsa-miR-10a	1	IRAK2
hsa-miR-10a	1	DAPK1
hsa-miR-10a	1	FASLG
hsa-miR-10a	1	NLRP1
hsa-miR-10a	1	TNFRSF10D
hsa-miR-10a	1	IL1RAP
hsa-miR-10a	1	TNFRSF1A
hsa-miR-10a	1	PRKAR2B
hsa-miR-10b	1	PPP3R1
hsa-miR-10b	1	DEDD
hsa-miR-10b	1	CASP7
hsa-miR-10b	1	EGFR
hsa-miR-10b	1	UBA52
hsa-miR-10b	1	HTRA2
hsa-miR-10b	1	PEA15
hsa-miR-10b	1	CASP2
hsa-miR-10b	1	BCL6
hsa-miR-10b	1	CARD8
hsa-miR-10b	1	CDC6
hsa-miR-10b	1	BAG5
hsa-miR-10b	1	CASP8
hsa-miR-10b	1	PTEN
hsa-miR-10b	1	IRAK4
hsa-miR-10b	1	PPP3CB
hsa-miR-10b	1	PRKACA
hsa-miR-10b	1	PRKAR2A
hsa-miR-10b	1	PIK3R3
hsa-miR-10b	1	MAP3K7
hsa-miR-10b	1	PIK3CA
hsa-miR-10b	1	DFFB
hsa-miR-10b	1	PCNA
hsa-miR-10b	1	CRADD
hsa-miR-10b	1	IRAK2
hsa-miR-10b	1	DAPK1
hsa-miR-10b	1	FASLG
hsa-miR-10b	1	NLRP1
hsa-miR-10b	1	TNFRSF10D
hsa-miR-10b	1	IL1RAP
hsa-miR-10b	1	TNFRSF1A
hsa-miR-34a	1	MITF
hsa-miR-34a	1	IKBKG
hsa-miR-34a	1	PRKAR1A
hsa-miR-34a	1	PEA15
hsa-miR-34a	1	CASP2
hsa-miR-34a	1	BCL6
hsa-miR-34a	1	IKBKB
hsa-miR-34a	1	BRCA1
hsa-miR-34a	1	NFKBIA
hsa-miR-34a	1	RTN4
hsa-miR-34a	1	PML
hsa-miR-34a	1	NAIP
hsa-miR-34a	1	RARG
hsa-miR-34a	1	BFAR
hsa-miR-34a	1	DFFA
hsa-miR-34a	1	MYC
hsa-miR-34a	1	DCC
hsa-miR-34a	1	CCND1
hsa-miR-34a	1	PPP3R2
hsa-miR-34a	1	IRAK2
hsa-miR-34a	1	DEDD2
hsa-miR-34a	1	CYCS
hsa-miR-34a	1	BAX
hsa-miR-34a	1	CFLAR
hsa-miR-34a	1	KAT5
hsa-miR-34a	1	ATM
hsa-miR-34a	1	MKI67
hsa-miR-34a	1	CDKN1B
hsa-miR-34a	1	BCL2L13
hsa-miR-34a	1	MAPK1
hsa-miR-34a	1	BIRC5
hsa-miR-181a	1	PPP3R1
hsa-miR-181a	1	FAS
hsa-miR-181a	1	MITF
hsa-miR-181a	1	PIK3R5
hsa-miR-181a	1	TNF
hsa-miR-181a	1	NAIP
hsa-miR-181a	1	IL1RAP
hsa-miR-181a	1	NRAS
hsa-miR-181a	1	KRAS
hsa-miR-181a	1	BCL6
hsa-miR-181a	1	CARD8
hsa-miR-181a	1	BAG4
hsa-miR-181a	1	BID
hsa-miR-181a	1	DFFB
hsa-miR-181a	1	BCL2
hsa-miR-181a	1	RNF8
hsa-miR-181a	1	CSF2RB
hsa-miR-181a	1	BAG5
hsa-miR-181a	1	PRKACB
hsa-miR-181a	1	TNFRSF10B
hsa-miR-181a	1	CASP1
hsa-miR-181a	1	PSEN1
hsa-miR-181a	1	APC
hsa-miR-181a	1	PTEN
hsa-miR-181a	1	CASP10
hsa-miR-181a	1	BAX
hsa-miR-181a	1	PPP3CB
hsa-miR-181a	1	ATM
hsa-miR-181a	1	PIK3R3
hsa-miR-181a	1	MDM2
hsa-miR-181a	1	DCC
hsa-miR-181a	1	MSH2
hsa-miR-181a	1	CRADD
hsa-miR-181a	1	NOD1
hsa-miR-181a	1	IRAK3
hsa-miR-181a	1	IL1A
hsa-miR-181a	1	ENDOD1
hsa-miR-181a	1	PML
hsa-miR-181a	1	AKT2
hsa-miR-181a	1	IL3
hsa-miR-181a	1	ABCB1
hsa-miR-181a	1	MALT1
hsa-miR-181a	1	RPS27A
hsa-miR-181a	1	IFNG
hsa-miR-181a	1	AKT3
hsa-miR-181a	1	CDKN1B
hsa-miR-181a	1	MAPK1
hsa-miR-181a	1	PARP1
hsa-miR-181b	1	PPP3R1
hsa-miR-181b	1	CASP9
hsa-miR-181b	1	FAS
hsa-miR-181b	1	MITF
hsa-miR-181b	1	PIK3R5
hsa-miR-181b	1	TNF
hsa-miR-181b	1	NAIP
hsa-miR-181b	1	IL1RAP
hsa-miR-181b	1	NRAS
hsa-miR-181b	1	KRAS
hsa-miR-181b	1	BCL6
hsa-miR-181b	1	CARD8
hsa-miR-181b	1	BAG4
hsa-miR-181b	1	BID
hsa-miR-181b	1	NFKBIA
hsa-miR-181b	1	BCL2
hsa-miR-181b	1	RNF8
hsa-miR-181b	1	BAG1
hsa-miR-181b	1	CSF2RB
hsa-miR-181b	1	BAG5
hsa-miR-181b	1	PRKACB
hsa-miR-181b	1	TNFRSF10B
hsa-miR-181b	1	TNFRSF1A
hsa-miR-181b	1	MAP3K14
hsa-miR-181b	1	CASP1
hsa-miR-181b	1	BFAR
hsa-miR-181b	1	PSEN1
hsa-miR-181b	1	APC
hsa-miR-181b	1	PTEN
hsa-miR-181b	1	IRAK4
hsa-miR-181b	1	CASP10
hsa-miR-181b	1	BAX
hsa-miR-181b	1	PPP3CB
hsa-miR-181b	1	ATM
hsa-miR-181b	1	PIK3R3
hsa-miR-181b	1	MDM2
hsa-miR-181b	1	DCC
hsa-miR-181b	1	MAP3K7
hsa-miR-181b	1	PPP3R2
hsa-miR-181b	1	MSH2
hsa-miR-181b	1	CRADD
hsa-miR-181b	1	IRAK3
hsa-miR-181b	1	IL1A
hsa-miR-181b	1	ENDOD1
hsa-miR-181b	1	AKT2
hsa-miR-181b	1	IL3
hsa-miR-181b	1	ABCB1
hsa-miR-181b	1	MALT1
hsa-miR-181b	1	RPS27A
hsa-miR-181b	1	IFNG
hsa-miR-181b	1	AKT3
hsa-miR-181b	1	CDKN1B
hsa-miR-181b	1	MAPK1
hsa-miR-181c	1	PPP3R1
hsa-miR-181c	1	FAS
hsa-miR-181c	1	MITF
hsa-miR-181c	1	PIK3R5
hsa-miR-181c	1	TNF
hsa-miR-181c	1	MDM2
hsa-miR-181c	1	NAIP
hsa-miR-181c	1	IL1RAP
hsa-miR-181c	1	NRAS
hsa-miR-181c	1	KRAS
hsa-miR-181c	1	BCL6
hsa-miR-181c	1	CARD8
hsa-miR-181c	1	BAG4
hsa-miR-181c	1	BID
hsa-miR-181c	1	DFFB
hsa-miR-181c	1	BCL2
hsa-miR-181c	1	RNF8
hsa-miR-181c	1	CSF2RB
hsa-miR-181c	1	BAG5
hsa-miR-181c	1	PRKACB
hsa-miR-181c	1	TNFRSF10B
hsa-miR-181c	1	CASP1
hsa-miR-181c	1	BFAR
hsa-miR-181c	1	APC
hsa-miR-181c	1	PTEN
hsa-miR-181c	1	CASP10
hsa-miR-181c	1	PPP3CB
hsa-miR-181c	1	ATM
hsa-miR-181c	1	PIK3R3
hsa-miR-181c	1	DCC
hsa-miR-181c	1	MSH2
hsa-miR-181c	1	CRADD
hsa-miR-181c	1	NOD1
hsa-miR-181c	1	IRAK3
hsa-miR-181c	1	IL1A
hsa-miR-181c	1	ENDOD1
hsa-miR-181c	1	PML
hsa-miR-181c	1	AKT2
hsa-miR-181c	1	IL3
hsa-miR-181c	1	ABCB1
hsa-miR-181c	1	MALT1
hsa-miR-181c	1	RPS27A
hsa-miR-181c	1	IFNG
hsa-miR-181c	1	AKT3
hsa-miR-181c	1	CDKN1B
hsa-miR-181c	1	MAPK1
hsa-miR-182	1	PPP3R1
hsa-miR-182	1	CASP9
hsa-miR-182	1	MITF
hsa-miR-182	1	PIK3R5
hsa-miR-182	1	BCL2L13
hsa-miR-182	1	PML
hsa-miR-182	1	PRKAR1A
hsa-miR-182	1	IL1RAP
hsa-miR-182	1	NRAS
hsa-miR-182	1	NFKB1
hsa-miR-182	1	KRAS
hsa-miR-182	1	BAG4
hsa-miR-182	1	TNFSF10
hsa-miR-182	1	RNF8
hsa-miR-182	1	RTN4
hsa-miR-182	1	BAG1
hsa-miR-182	1	RELA
hsa-miR-182	1	PRKACB
hsa-miR-182	1	MAP3K14
hsa-miR-182	1	RARG
hsa-miR-182	1	APC
hsa-miR-182	1	IL1R1
hsa-miR-182	1	CASP3
hsa-miR-182	1	TRAF1
hsa-miR-182	1	PPP3CA
hsa-miR-182	1	PPP3CB
hsa-miR-182	1	ATM
hsa-miR-182	1	MYC
hsa-miR-182	1	PPP3R2
hsa-miR-182	1	BIRC5
hsa-miR-182	1	CYCS
hsa-miR-182	1	FAS
hsa-miR-182	1	FADD
hsa-miR-182	1	BRCA2
hsa-miR-182	1	ABCB1
hsa-miR-182	1	IL6
hsa-miR-182	1	DFFA
hsa-miR-182	1	TNFRSF1A
hsa-miR-182	1	MFN2
hsa-miR-182	1	CDKN1B
hsa-miR-182	1	BAG3
hsa-miR-183	1	FAS
hsa-miR-183	1	TRAF2
hsa-miR-183	1	IKBKB
hsa-miR-183	1	PRKAR1A
hsa-miR-183	1	BNIP3L
hsa-miR-183	1	NRAS
hsa-miR-183	1	EGFR
hsa-miR-183	1	NFKB1
hsa-miR-183	1	CASP2
hsa-miR-183	1	DFFB
hsa-miR-183	1	MSH2
hsa-miR-183	1	PPP3CA
hsa-miR-183	1	MMP9
hsa-miR-183	1	AKT1
hsa-miR-183	1	MYC
hsa-miR-183	1	PRKACB
hsa-miR-183	1	PCNA
hsa-miR-183	1	PRKACG
hsa-miR-183	1	CYCS
hsa-miR-183	1	PIK3R1
hsa-miR-183	1	FGFR1
hsa-miR-183	1	MKI67
hsa-miR-183	1	BCL2L13
hsa-miR-183	1	MFN2
hsa-miR-183	1	ATM
hsa-miR-183	1	BAG3
hsa-miR-187	1	BCL6
hsa-miR-187	1	CARD8
hsa-miR-187	1	MYD88
hsa-miR-187	1	CASP8
hsa-miR-187	1	PPP3CA
hsa-miR-187	1	MKI67
hsa-miR-187	1	RPS27A
hsa-miR-187	1	MDM2
hsa-miR-199b	1	MITF
hsa-miR-199b	1	BNIP3L
hsa-miR-199b	1	NFKB1
hsa-miR-199b	1	HTRA2
hsa-miR-199b	1	KRAS
hsa-miR-199b	1	BAG4
hsa-miR-199b	1	BID
hsa-miR-199b	1	IKBKB
hsa-miR-199b	1	BRCA1
hsa-miR-199b	1	DFFB
hsa-miR-199b	1	CDC6
hsa-miR-199b	1	PIK3R1
hsa-miR-199b	1	BAG1
hsa-miR-199b	1	SP1
hsa-miR-199b	1	PIK3CD
hsa-miR-199b	1	APP
hsa-miR-199b	1	IL1RAP
hsa-miR-199b	1	VEGFA
hsa-miR-199b	1	IRAK4
hsa-miR-199b	1	CASP4
hsa-miR-199b	1	IRAK3
hsa-miR-199b	1	TNFRSF10D
hsa-miR-199b	1	MALT1
hsa-miR-199b	1	ATM
hsa-miR-199b	1	CARD8
hsa-miR-199b	1	CDKN1B
hsa-miR-203	1	FAS
hsa-miR-203	1	MITF
hsa-miR-203	1	IKBKB
hsa-miR-203	1	PIK3CG
hsa-miR-203	1	IL6
hsa-miR-203	1	EGFR
hsa-miR-203	1	CASP2
hsa-miR-203	1	CARD8
hsa-miR-203	1	PCNA
hsa-miR-203	1	PTEN
hsa-miR-203	1	PIK3R2
hsa-miR-203	1	TNFSF10
hsa-miR-203	1	DFFB
hsa-miR-203	1	BCL2
hsa-miR-203	1	BIRC2
hsa-miR-203	1	MYD88
hsa-miR-203	1	SP1
hsa-miR-203	1	PRKACB
hsa-miR-203	1	BAG3
hsa-miR-203	1	PIK3CD
hsa-miR-203	1	TNFRSF10B
hsa-miR-203	1	APP
hsa-miR-203	1	VEGFA
hsa-miR-203	1	CASP8
hsa-miR-203	1	APC
hsa-miR-203	1	CHUK
hsa-miR-203	1	DIABLO
hsa-miR-203	1	CASP3
hsa-miR-203	1	PPP3CA
hsa-miR-203	1	CASP10
hsa-miR-203	1	PPP3CB
hsa-miR-203	1	ATM
hsa-miR-203	1	RIPK1
[truncated: 70,297 more rows]
